# Supplementary material for: Multiplex 16S rRNA‐derived geno‐biochip for detection of 16 bacterial pathogens from contaminated foods
Source: PubMed Central journal article supplement (PMC5132059; doi:10.1002/biot.201600043), 2016-09-06
Supplement: BIOT-11-1405-s001.pdf [file BIOT-11-1405-s001.pdf]

Supporting Information for DOI 10.1002/biot.201600043

**Multiplex 16S rRNA-derived geno-biochip for detection  
of 16 bacterial pathogens from contaminated foods**

---

*Hwa Hui Shin, Byeong Hee Hwang, and Hyung Joon Cha*

**Supporting information**

**Multiplex 16S rRNA-derived geno-biochip for detection of 16  
bacterial pathogens from contaminated foods**

**Hwa Hui Shin<sup>1,+</sup>, Byeong Hee Hwang<sup>1,2,+</sup>, Hyung Joon Cha<sup>1,\*</sup>**

<sup>1</sup>Department of Chemical Engineering, Pohang University of Science and Technology,  
Pohang, 790-784, Korea

<sup>2</sup>Division of Bioengineering, Incheon National University, Incheon 406-772, Korea

<sup>+</sup>Equal contribution

**Correspondence:** Prof. Hyung Joon Cha, Department of Chemical Engineering, Pohang  
University of Science and Technology, 790-784, Korea

**E-mail:** [hjcha@postech.ac.kr](mailto:hjcha@postech.ac.kr)

**Table S1.** Bacterial strains used in this study.

| <b>Bacteria</b>                                                            | <b>Source and strain</b> | <b>Biosafety level</b> |
|----------------------------------------------------------------------------|--------------------------|------------------------|
| <i>Bacillus cereus</i>                                                     | ATCC 11778               | 1                      |
|                                                                            | ATCC 13061               | 1                      |
|                                                                            | ATCC 14579               | 1                      |
| <i>Campylobacter jejuni</i>                                                | ATCC 33291               | 2                      |
| <i>Clostridium perfringens</i>                                             | ATCC 13124               | 2                      |
| <i>Escherichia coli</i>                                                    | ATCC 25922               | 1                      |
| <i>Escherichia coli</i> O157:H7                                            | ATCC 43894               | 2                      |
| <i>Listeria monocytogenes</i>                                              | ATCC 15313               | 2                      |
| <i>Salmonella enterica</i> subsp. <i>enterica</i><br>serotype Choleraesuis | ATCC 10708               | 2                      |
|                                                                            | ATCC 13312               | 2                      |
|                                                                            | ATCC 7001                | 2                      |
| <i>Salmonella enterica</i> subsp. <i>enterica</i><br>serotype Enteritidis  | ATCC 31194 (IFO 3313)    | 2                      |
| <i>Shigella boydii</i>                                                     | ATCC 8700                | 2                      |
|                                                                            | ATCC 35966               | 2                      |
| <i>Shigella dysenteriae</i>                                                | ATCC 13313               | 2                      |
|                                                                            | ATCC 9290                | 2                      |
| <i>Shigella sonnei</i>                                                     | ATCC 25931               | 2                      |
|                                                                            | ATCC 29930               | 2                      |
| <i>Staphylococcus aureus</i>                                               | ATCC 6538                | 2                      |
| <i>Vibrio cholerae</i>                                                     | ATCC 14035               | 2                      |
| <i>Vibrio parahaemolyticus</i>                                             | ATCC 17802               | 2                      |
| <i>Vibrio vulnificus</i>                                                   | ATCC 27562               | 2                      |
| <i>Yersinia enterocolitica</i>                                             | ATCC 23715               | 2                      |

ATCC: American Type Culture Collection (Manassas, VA, USA).

IFO: Institute for Fermentation (IFO; Osaka, Japan)

**Table S2.** Newly designed specific capture probes and their thermodynamic properties<sup>a</sup>.

| <b>Bacteria</b>                | <b>Probe Name</b> | <b>Sequences (5'-3', 5'-amine-spacer, spacer:C6)</b> | <b>Length (bp)</b> | <b>T<sub>m</sub> (°C)</b> | <b>Rating</b> |
|--------------------------------|-------------------|------------------------------------------------------|--------------------|---------------------------|---------------|
| <i>Bacillus cereus</i>         | BACE-1            | CCTCGCGGTCTTGCAGCTCTT                                | 20                 | 63.0                      | 81            |
|                                | BACE-2            | CCACCTGTCACTCTGCTCCCG                                | 21                 | 65.0                      | 100           |
|                                | BACE-3            | CTGCTCCCGAAGGAGAAGCC                                 | 20                 | 63.6                      | 85            |
| <i>Campylobacter jejuni</i>    | CAJE-1            | CACTCTAGACTATCAGTTTCCCAAGC                           | 26                 | 68.6                      | 88            |
|                                | CAJE-2            | TACCCCTACACCACCAATTCCATCTG                           | 26                 | 67.3                      | 91            |
| <i>Clostridium perfringens</i> | CLPE-1            | CGGAGGTGTTGAAACCCCA                                  | 20                 | 65.0                      | 100           |
|                                | CLPE-2            | CACCCAATCGCTGACCCTA                                  | 20                 | 62.9                      | 100           |
| <i>Shigella boydii</i>         | SHBO-1            | CCCCACCAACAAGCTAATCCC                                | 21                 | 63.1                      | 57            |
|                                | SHBO-2            | ACATTCTCATCTCTGAAAACCTCCGT                           | 26                 | 62.1                      | 92            |
|                                | SHBO-3            | GCGAATCAGCAAGCTGATTCC                                | 21                 | 62.3                      | 68            |
| <i>Shigella sonnei</i>         | SHSO-1            | GCGAAACAGCAAGCTGTTTCC                                | 21                 | 62.5                      | 67            |
|                                | SHSO-2            | ACCAATCCATCTCTGGAAAGTTCTGT                           | 25                 | 62.9                      | 86            |

<sup>a</sup> All thermodynamic properties were calculated by Primer Premier.

**Table S3.** Detection results from Figure S2 for 6 pathogenic bacteria.

| <b>Bacteria</b>       | <b>Detection results</b>    |                            |                             |
|-----------------------|-----------------------------|----------------------------|-----------------------------|
|                       | <b>Positive<sup>a</sup></b> |                            | <b>Negative<sup>b</sup></b> |
|                       | <b>True</b>                 | <b>False</b>               | <b>False</b>                |
| <i>B. cereus</i>      | BACE-1,2, and 3             | STAU-1                     |                             |
| <i>C. perfringens</i> | CLPE-1                      |                            | CLPE-2                      |
| <i>C. jejuni</i>      | CAJE-1 and 2                | BACE-3 and STAU-1          |                             |
| <i>S. boydii</i>      | SHBO-1 and 2                | ESCO, SHDY-2, and SHSO-1   | SHBO-3                      |
| <i>S. dysenteriae</i> | SHDY-1 and 2                | ESCOO-2 and SHSO-1         |                             |
| <i>S. sonnei</i>      | SHSO-1                      | BACE-3, SHBO-2, and SHDY-2 | SHSO-2                      |

<sup>a</sup> Positive if  $S/N \geq 2$

<sup>b</sup> Negative if  $S/N < 2$

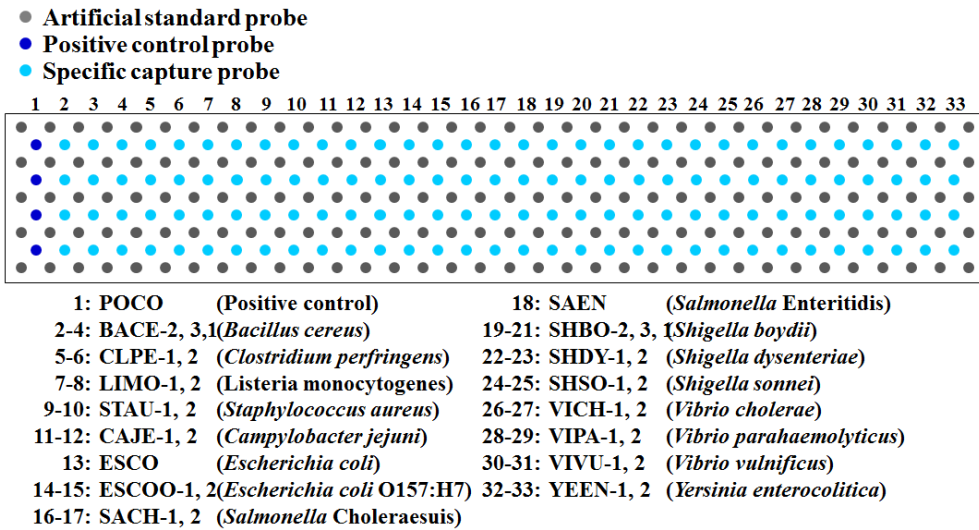

**Figure S1.** The schematic diagrams of the array format for the 16S rRNA-derived geno-biochip containing 32 specific DNA oligonucleotide capture probes before the final selection

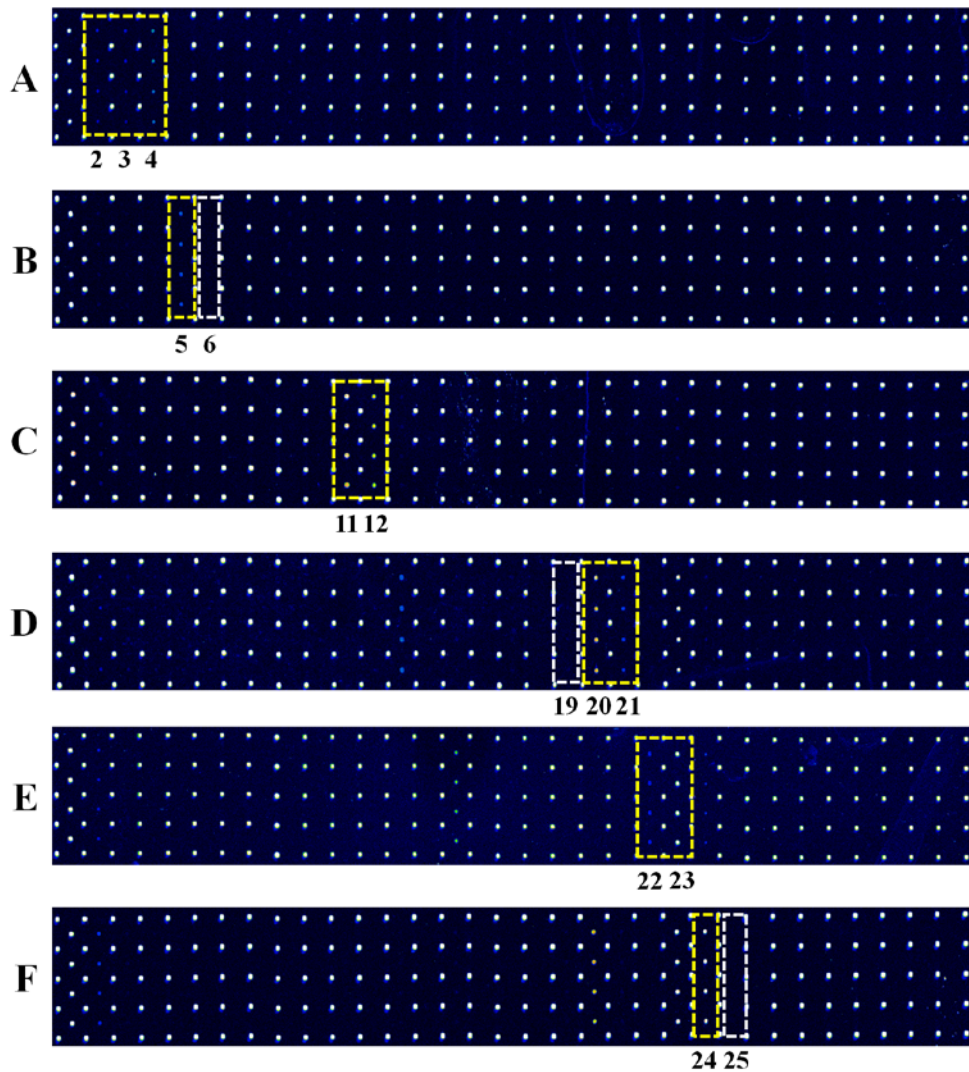

**Figure S2.** The raw images of hybridization with each amplified 16S rDNA target using the array format in Figure S1: (A) *B. cereus*, (B) *C. perfringens*, (C) *C. jejuni*, (D) *S. boydii*, (E) *S. dysenteriae*, and (F) *S. sonnei*. The yellow dotted boxes indicate observed specific spots and the white dotted boxes indicate unobserved specific spots. The numbers indicate those of capture probes in the array format.

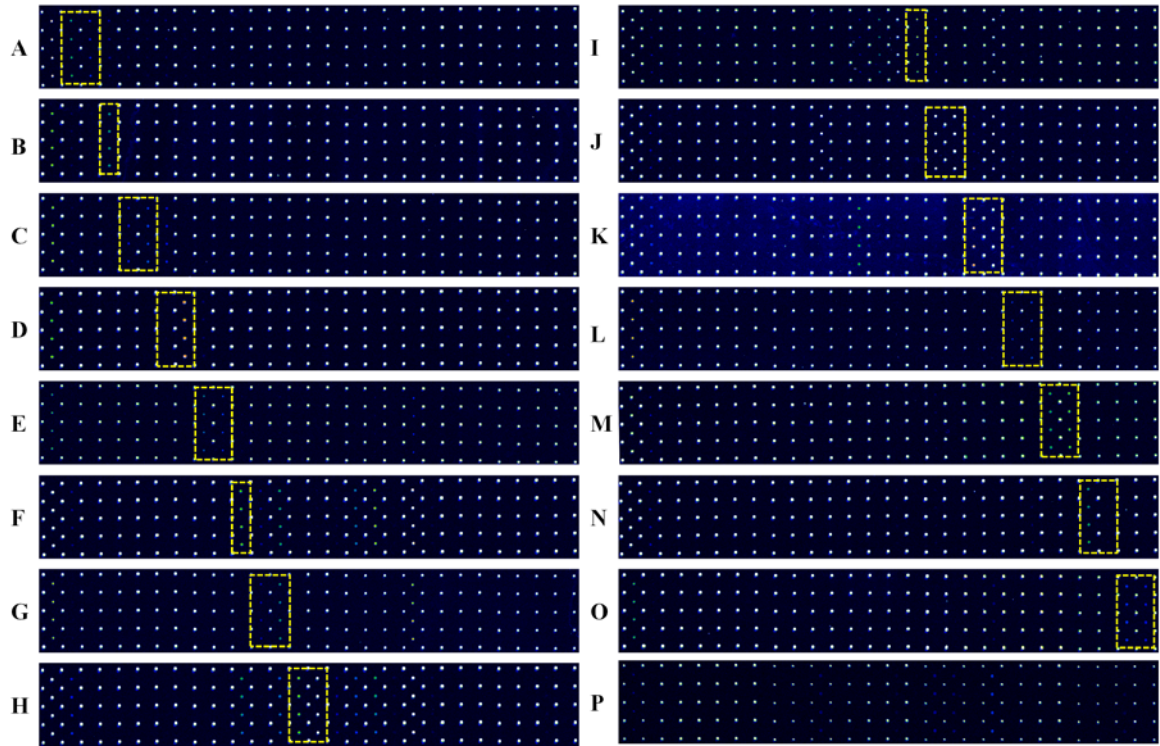

**Figure S3.** The raw images of hybridization with each amplified 16S rDNA target using the array format in Figure 1: (A) *B. cereus*, (B) *C. perfringens*, (C) *L. monocytogenes*, (D) *S. aureus*, (E) *C. jejuni*, (F) *E. coli*, (G) *E. coli* O157:H7, (H) *S. enterica* subsp. *enterica* serotype Choleraesuis (I) *S. enterica* subsp. *enterica* serotype Enteritidis (J) *S. boydii*, (K) *S. dysenteriae*, (L) *V. cholerae*, (M) *V. parahaemolyticus*, (N) *V. vulnificus*, (O) *Y. enterocolitica*, and (P) *S. sonnei*. The yellow dotted boxes indicate observed specific spots.



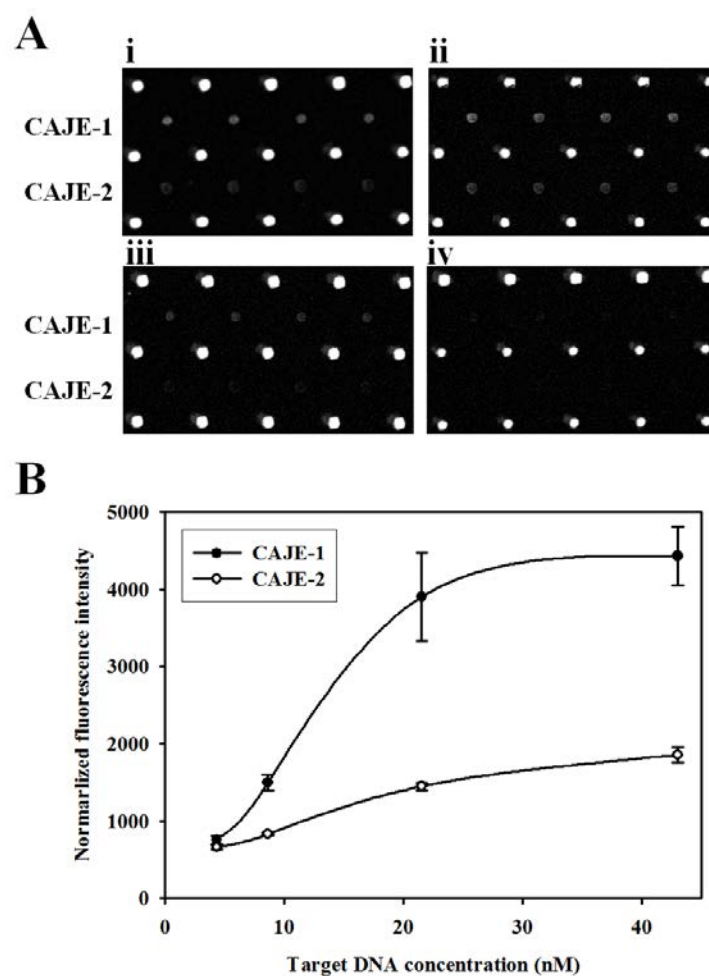

**Figure S4.** Sensitivity of the 16S rRNA-derived geno-biochip using *C. jejuni*. The diluted PCR amplicons were used for sensitivity determination. (A) Raw hybridization images for (i) 43 nM, (ii) 21.5 nM, (iii) 8.6 nM, and (iv) 4.3 nM 16S rDNA targets; and (B) the plot of dynamic detection ranges based on the normalized fluorescence intensities according to target DNA concentration changes for each capture probe CAJE 1 (closed circle) and CAJE 2 (open circle). Each value was the mean of 4 repeated spots, and the error bars represent standard deviation.
